# Supplementary material for: Synthesis of Gd2O3 Nanoparticles and Their Photocatalytic Activity for Degradation of Azo Dyes
Source: MDPI journal article supplement (doi:10.3390/catal11060742), 2021-06-17
Supplement: s1 [file s1]

# Synthesis of $\text{Gd}_2\text{O}_3$ nanoparticles and their photocatalytic activity for degradation of azo dyes

Sugyeong Jeon <sup>1</sup>, Jeong Won Ko <sup>2</sup> and Weon Bae Ko <sup>1,2,3,\*</sup>

<sup>1</sup> Department of Convergence Science, Graduate School of Sahmyook University, Seoul 01795, Republic of Korea

<sup>2</sup> Department of Animal Life Resources, Chemistry Major, Sahmyook University, 815 Hwarang-ro, Nowon-gu, Seoul 01795, Republic of Korea

<sup>3</sup> Department of Chemistry, Sahmyook University, Seoul 01795, Republic of Korea

\* Correspondence: kowb@syu.ac.kr; Tel.: +820233991700

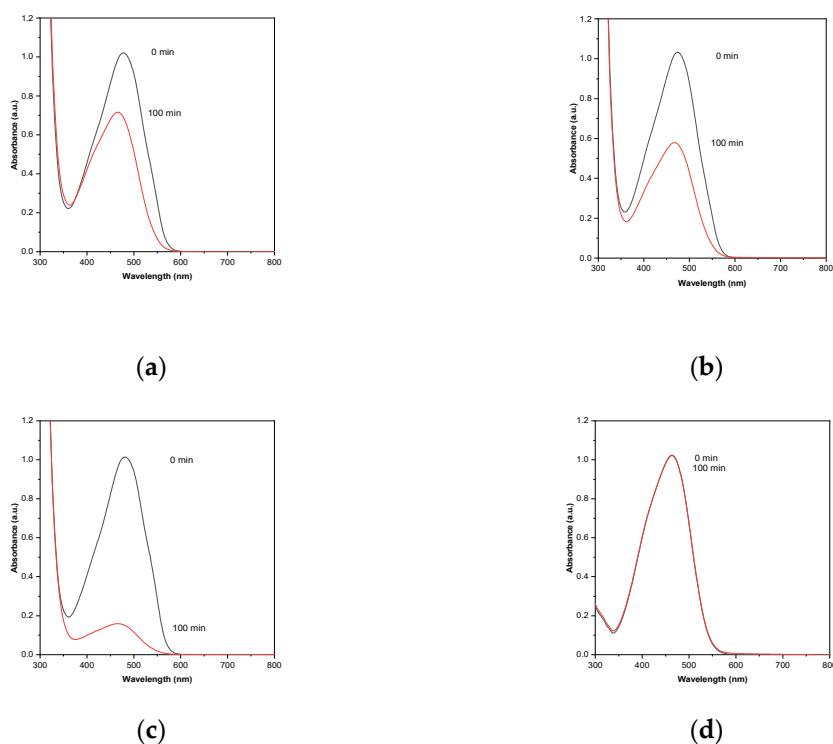

**Figure S1.** UV-vis absorption spectra of photocatalytic degradation of the MO dye (a) UV/ $\text{H}_2\text{O}_2$  (b)  $\text{H}_2\text{O}_2/\text{Gd}_2\text{O}_3$  (c) UV/ $\text{H}_2\text{O}_2/\text{Gd}_2\text{O}_3$  (d) UV/ $\text{Gd}_2\text{O}_3$  methods within the time period of 100 min. (Experimental conditions: initial dye concentration 0.042 mM; wavelength of UV irradiation: 254 nm;  $\text{H}_2\text{O}_2$  concentration: 500 mM; photocatalyst concentration: 1.0 g/L.)

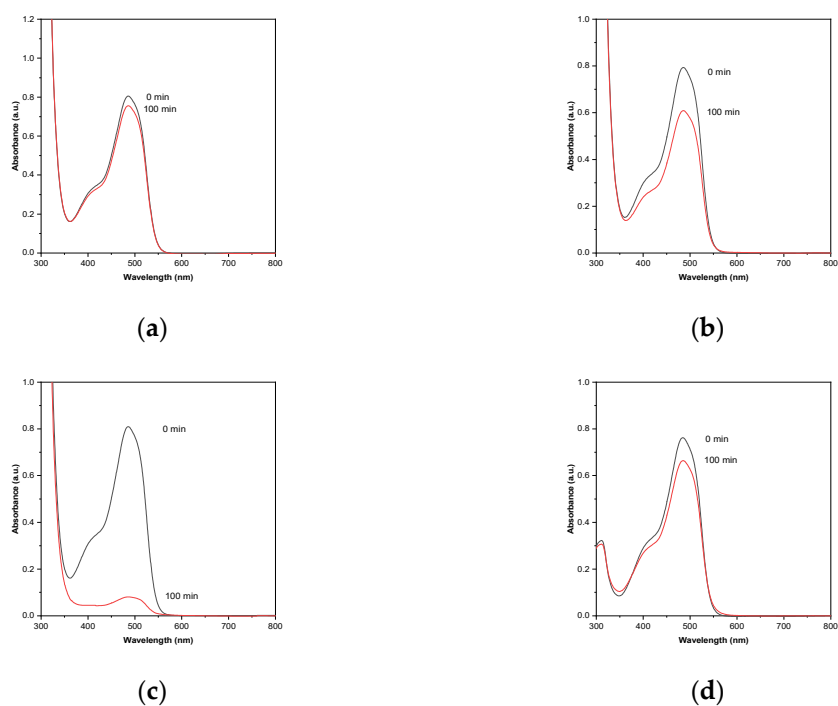

**Figure S2.** UV-vis absorption spectra of photocatalytic degradation of the AO7 dye (a) UV/H<sub>2</sub>O<sub>2</sub> (b) H<sub>2</sub>O<sub>2</sub>/Gd<sub>2</sub>O<sub>3</sub> (c) UV/H<sub>2</sub>O<sub>2</sub>/Gd<sub>2</sub>O<sub>3</sub> (d) UV/Gd<sub>2</sub>O<sub>3</sub> methods within the time period of 100 min. (Experimental conditions: initial dye concentration 0.042 mM; wavelength of UV irradiation: 254 nm; H<sub>2</sub>O<sub>2</sub> concentration: 500 mM; photocatalyst concentration: 1.0 g/L.)

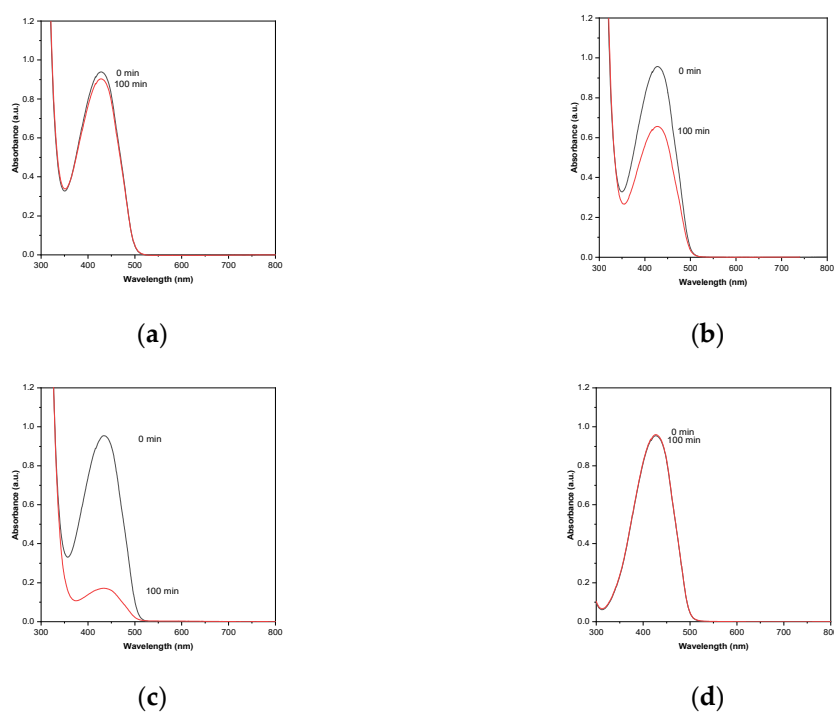

**Figure S3.** UV-vis absorption spectra of photocatalytic degradation of the AY23 dye (a) UV/ $\text{H}_2\text{O}_2$  (b)  $\text{H}_2\text{O}_2/\text{Gd}_2\text{O}_3$  (c) UV/ $\text{H}_2\text{O}_2/\text{Gd}_2\text{O}_3$  (d) UV/ $\text{Gd}_2\text{O}_3$  methods within the time period of 100 min. (Experimental conditions: initial dye concentration 0.042 mM; wavelength of UV irradiation: 254 nm;  $\text{H}_2\text{O}_2$  concentration: 500 mM; photocatalyst concentration: 1.0 g/L.)

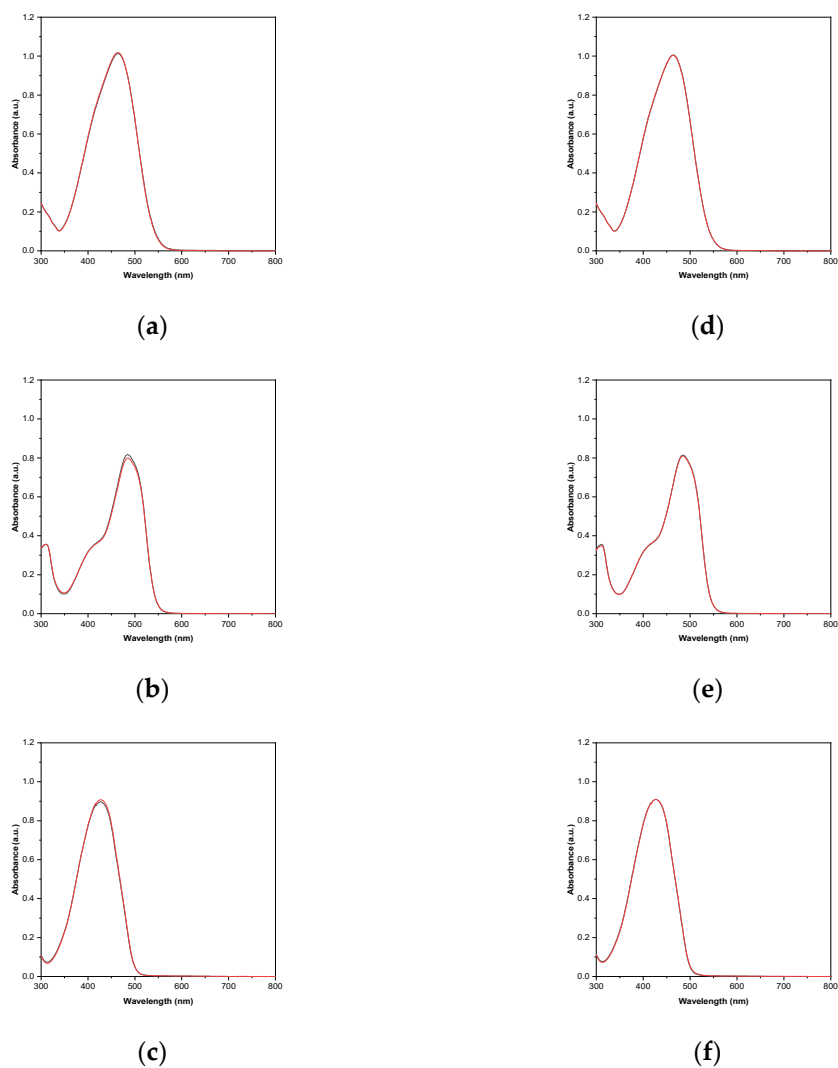

**Figure S4.** UV-vis absorption spectra of the (a) MO, (b) AO7, (c) AY23 under 254 nm irradiation and (d) MO, (e) AO7, (f) AY23 under 365 nm irradiation within the time period of 100 min. (Experimental conditions: initial dye concentration 0.042 mM.)

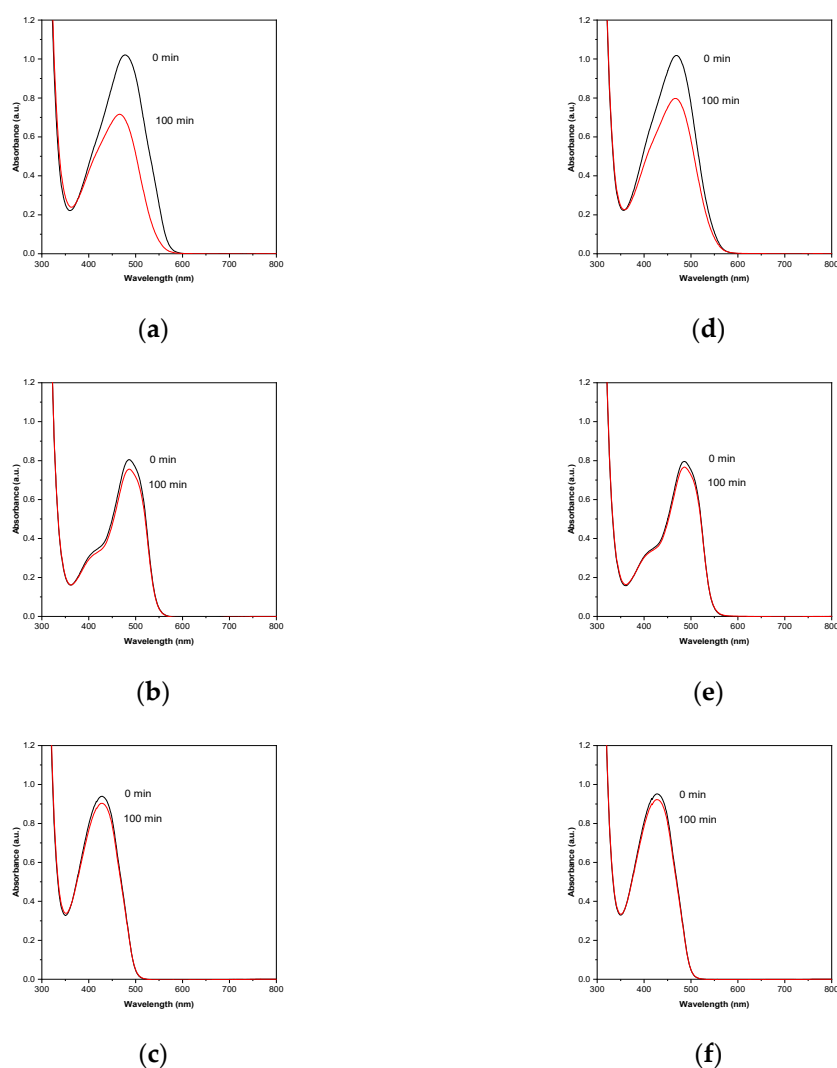

**Figure S5.** UV-vis absorption spectra of photocatalytic degradation of the (a) MO, (b) AO7, (c) AY23 by UV/H<sub>2</sub>O<sub>2</sub> methods under 254 nm irradiation and (d) MO, (e) AO7, (f) AY23 under 365 nm irradiation within the time period of 100 min. (Experimental conditions: initial dye concentration 0.042 mM; H<sub>2</sub>O<sub>2</sub> concentration: 4.8 M)
